# Supplementary material
Source: MDPI journal article supplement (https://www.mdpi.com/2813-0464/2/4/37)
Supplement: s1 [file s1]

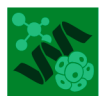

Supplementary Materials

# Determination of Target Crop Loads for Maximising Fruit Quality and Return Bloom in Several Apple Cultivars

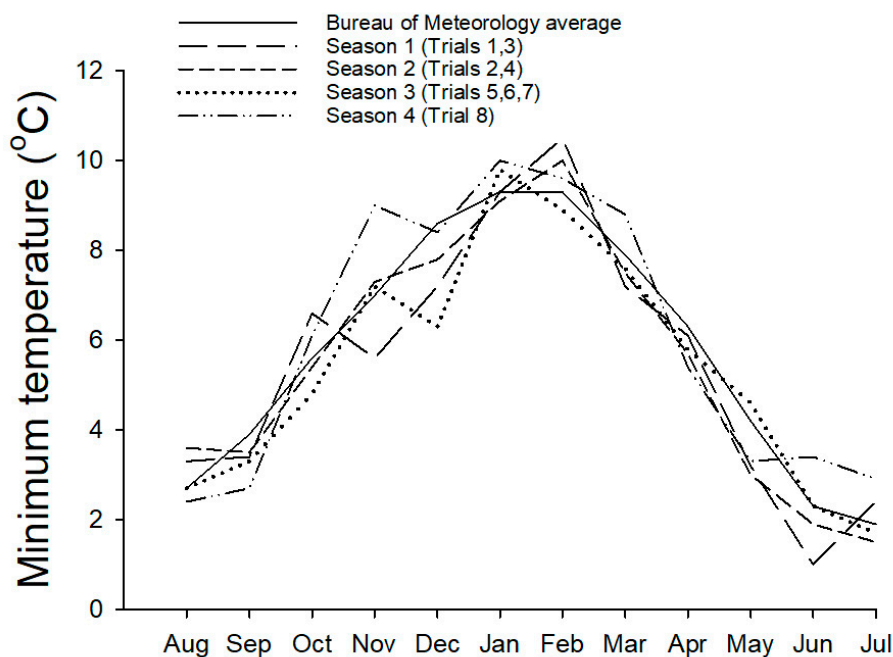

Figure S1. Minimum monthly temperatures for Huon Valley trial sites.

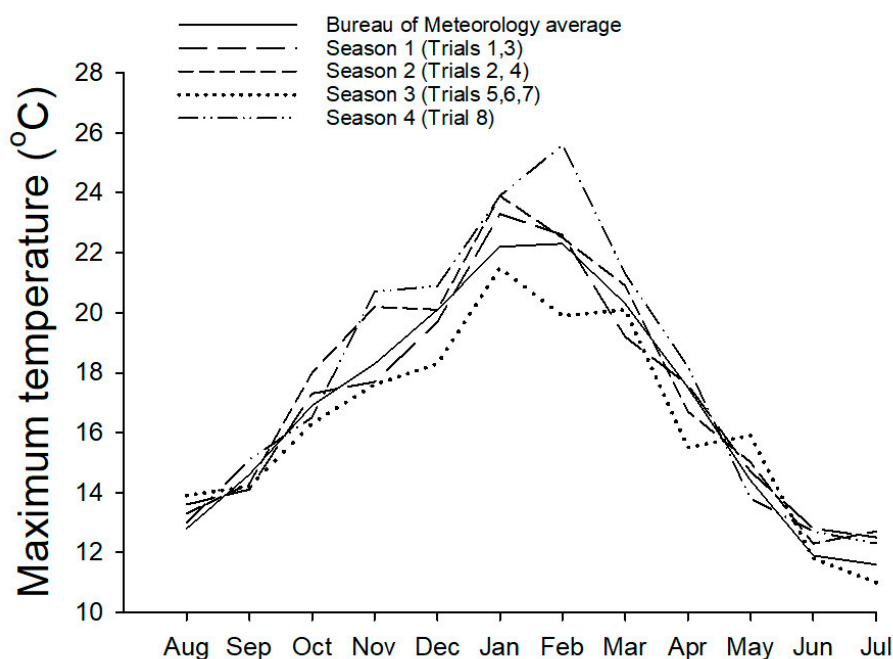

Figure S2. Maximum monthly temperatures for Huon Valley trial sites.

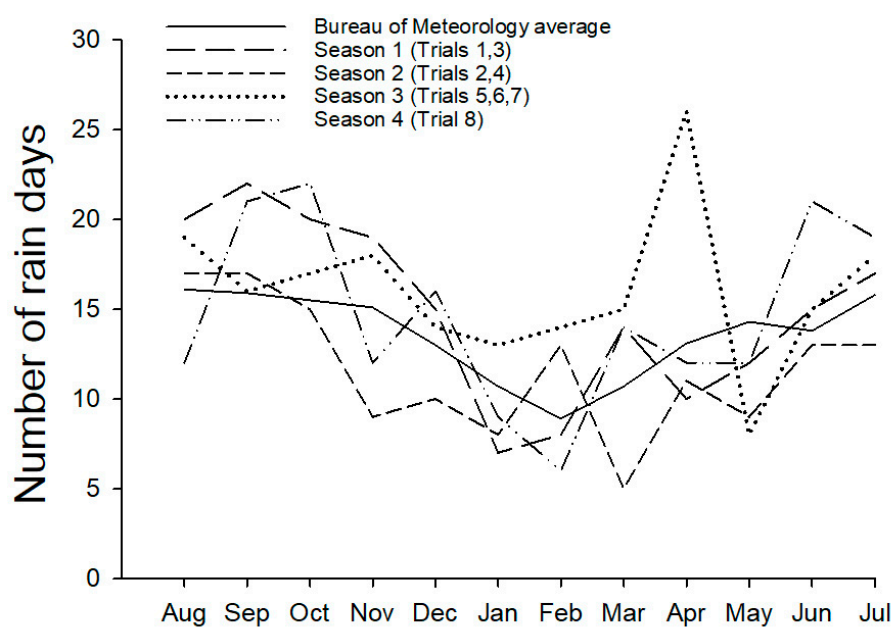

**Figure S3.** Number of rain days for Huon Valley trial sites.

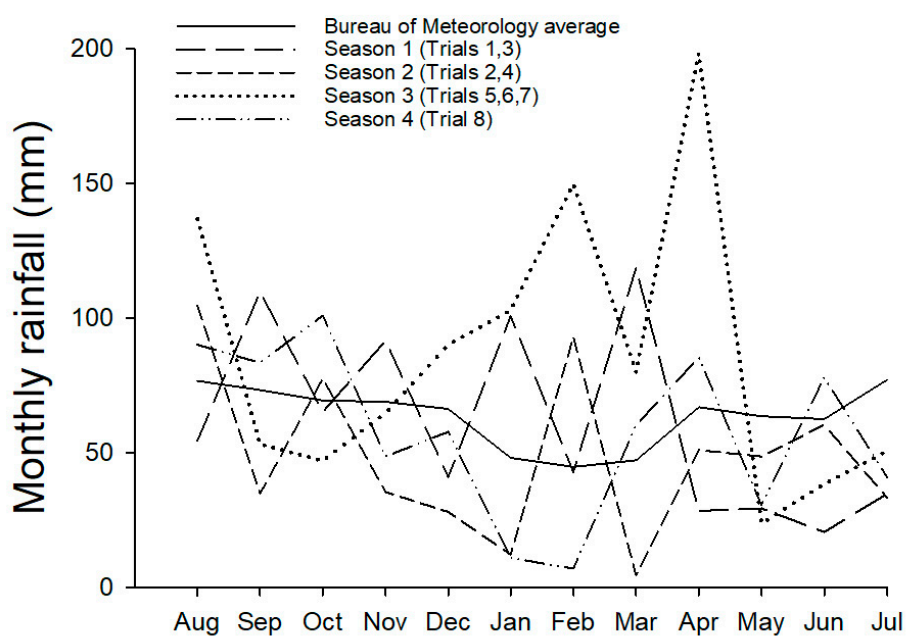

**Figure S4.** Average monthly rainfall for Huon Valley trial sites.

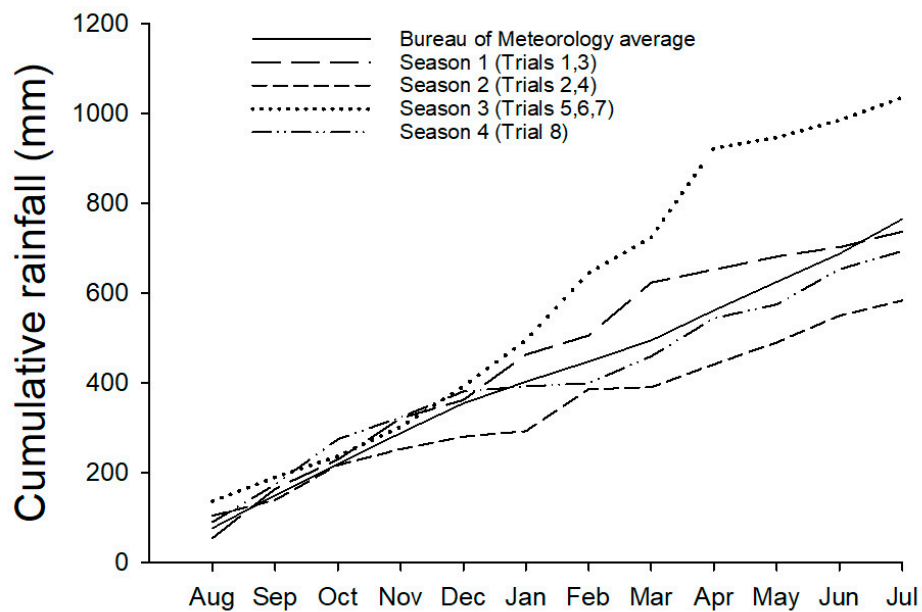

**Figure S5.** Cumulative rainfall over the growing season for trial sites.

**Table S1.** Rating scales used for background fruit colour (Frappell and O'Loughlin 1962).

| Rating | Code | Description                        |
|--------|------|------------------------------------|
| 1.     | G    | full green with no trace of yellow |
| 2.     | GGY  | more green than yellow             |
| 3.     | GY   | green and yellow equal             |
| 4.     | GYG  | more yellow than green             |
| 5.     | Y    | full yellow with no trace of green |

**Table S2.** Mean crop loads ( $\pm$  standard deviation) obtained for each treatment in Trials 1–8. All values are number of fruit  $\text{cm}^{-2}$  trunk cross-sectional area. wAFB, weeks after full bloom.

(i) Trials 1-3: 'Fuji' and 'Delicious'

| Target    | Trial 1            | Trial 2            | Trial 3           |
|-----------|--------------------|--------------------|-------------------|
| crop load | 'Fuji'             | 'Fuji'             | 'Delicious'       |
| 2         | 2.1 ( $\pm 0.5$ )  | 2.3 ( $\pm 0.4$ )  | 2.0 ( $\pm 0.1$ ) |
| 4         | 4.2 ( $\pm 0.2$ )  | 4.2 ( $\pm 0.2$ )  | 4.4 ( $\pm 0.2$ ) |
| 6         | 5.8 ( $\pm 0.5$ )  | 6.9 ( $\pm 0.4$ )  | 6.1 ( $\pm 0.4$ ) |
| 8         | 7.9 ( $\pm 0.8$ )  | 8.1 ( $\pm 0.3$ )  | 7.8 ( $\pm 0.7$ ) |
| 10        | 11.0 ( $\pm 1.6$ ) | 10.0 ( $\pm 0.2$ ) | 9.9 ( $\pm 0.4$ ) |

(ii) Trial 4: 'Delicious'

| Time    | Target | Actual            | Target | Actual            |
|---------|--------|-------------------|--------|-------------------|
| 1 wAFB  | 3      | 3.7 ( $\pm 0.5$ ) | 6      | 7.8 ( $\pm 0.7$ ) |
| 2 wAFB  | 3      | 4.3 ( $\pm 0.2$ ) | 6      | 7.6 ( $\pm 1.2$ ) |
| 4 wAFB  | 3      | 4.6 ( $\pm 0.8$ ) | 6      | 7.6 ( $\pm 1.3$ ) |
| 8 wAFB  | 3      | 4.7 ( $\pm 0.3$ ) | 6      | 7.9 ( $\pm 0.1$ ) |
| 12 wAFB | 3      | 3.7 ( $\pm 0.5$ ) | 6      | 6.6 ( $\pm 0.5$ ) |

|         |   |                   |   |                   |
|---------|---|-------------------|---|-------------------|
| 16 wAFB | 3 | 3.6 ( $\pm 0.7$ ) | 6 | 5.7 ( $\pm 1.1$ ) |
|---------|---|-------------------|---|-------------------|

(iii) Trial 5: 'Pink Lady'

| Time    | crop load | M26               | MM106             |
|---------|-----------|-------------------|-------------------|
| 2 wAFB  | 4         | 4.0 ( $\pm 0.3$ ) | 4.1 ( $\pm 0.5$ ) |
|         | 6         | 6.2 ( $\pm 0.7$ ) | 6.1 ( $\pm 0.6$ ) |
|         | 8         | 8.4 ( $\pm 0.4$ ) | 8.6 ( $\pm 1.4$ ) |
| 6 wAFB  | 4         | 3.5 ( $\pm 0.4$ ) | 3.9 ( $\pm 0.2$ ) |
|         | 6         | 6.2 ( $\pm 0.3$ ) | 5.7 ( $\pm 0.3$ ) |
|         | 8         | 8.1 ( $\pm 1.2$ ) | 7.6 ( $\pm 1.0$ ) |
| 10 wAFB | 4         | 4.1 ( $\pm 0.2$ ) | 3.9 ( $\pm 0.4$ ) |
|         | 6         | 6.3 ( $\pm 0.6$ ) | 6.2 ( $\pm 0.5$ ) |
|         | 8         | 8.0 ( $\pm 0.3$ ) | 8.2 ( $\pm 0.3$ ) |
| 14 wAFB | 4         | 4.0 ( $\pm 0.2$ ) | 3.9 ( $\pm 0.1$ ) |
|         | 6         | 5.9 ( $\pm 1.0$ ) | 5.9 ( $\pm 0.5$ ) |
|         | 8         | 8.2 ( $\pm 0.7$ ) | 8.3 ( $\pm 1.7$ ) |

(iii) Trials 5-6: 'Pink Lady' and 'Jonagold'

| Time   | Target    | Pink Lady     |                | Jonagold      |               |
|--------|-----------|---------------|----------------|---------------|---------------|
| (wAFB) | crop load | M26           | MM106          | M26           | MM106         |
| 2      | 4         | 4.0 (3.6-4.3) | 4.0 (3.5-4.3)  | 4.3 (3.8-4.6) | 4.0 (3.9-4.1) |
|        | 6         | 6.2 (5.1-6.9) | 6.1 (5.5-6.7)  | 5.9 (5.3-6.4) | 6.2 (5.8-6.7) |
|        | 8         | 8.4 (7.9-9.0) | 8.6 (7.5-10.7) | 8.3 (7.5-9.3) | 7.2 (7.0-7.5) |
| 6      | 4         | 3.8 (3.0-4.7) | 3.9 (3.6-4.1)  | 3.9 (3.4-4.1) | 3.9 (3.0-4.8) |
|        | 6         | 6.2 (5.7-6.5) | 5.7 (5.3-6.2)  | 6.1 (5.3-6.9) | 6.1 (5.7-6.7) |
|        | 8         | 8.1 (6.7-9.0) | 7.6 (6.7-8.7)  | 7.9 (7.7-8.2) | 7.5 (7.1-7.9) |
| 10     | 4         | 4.1 (3.7-4.4) | 3.9 (3.3-4.4)  | 4.0 (3.8-4.1) | 3.9 (3.5-4.1) |
|        | 6         | 6.3 (5.8-7.3) | 6.2 (5.8-7.0)  | 6.4 (6.2-6.6) | 6.2 (5.8-6.7) |
|        | 8         | 8.0 (7.7-8.3) | 8.3 (8.0-8.8)  | 8.1 (7.0-9.1) | 7.5 (7.2-7.6) |
| 14     | 4         | 4.0 (3.6-4.1) | 3.9 (3.6-4.0)  | 4.0 (3.9-4.1) | 3.8 (3.1-4.5) |
|        | 6         | 5.9 (4.5-7.0) | 5.9 (5.3-6.3)  | 6.1 (5.8-6.5) | 6.0 (5.7-6.4) |
|        | 8         | 8.2 (7.5-9.3) | 8.3 (6.5-10.7) | 7.8 (7.6-7.9) | 8.1 (6.8-9.2) |

(iv) Trial 7: 'Braeburn'

| Time   | Target    | Braeburn      |               |
|--------|-----------|---------------|---------------|
| (wAFB) | crop load | M26           | MM106         |
| 2      | 2         | 2.3 (1.6-3.0) | 2.4 (2.2-2.6) |
|        | 4         | 4.2 (3.2-4.6) | 4.0 (3.2-4.8) |
|        | 6         | 5.8 (4.8-6.8) | 5.9 (5.4-6.5) |
|        | 8         | 8.3 (7.6-9.4) | 7.9 (7.1-9.2) |

|    |   |               |               |
|----|---|---------------|---------------|
| 6  | 2 | 3.3 (2.9-3.6) | 3.0 (2.7-3.5) |
|    | 4 | 4.0 (3.8-4.1) | 4.3 (3.7-4.8) |
|    | 6 | 6.0 (5.2-6.4) | 5.9 (5.2-6.9) |
|    | 8 | 7.3 (7.2-7.4) | 8.3 (7.6-9.2) |
| 10 | 2 | 2.6 (2.2-3.1) | 2.0 (1.9-2.1) |
|    | 4 | 4.0 (3.9-4.1) | 4.2 (3.9-4.5) |
|    | 6 | 5.7 (5.5-6.0) | 6.1 (5.8-6.6) |
|    | 8 | 7.2 (6.9-7.4) | 8.0 (7.1-8.9) |

(v) Trial 8: 'Gala'

| Time    | Target | Actual            | Target | Actual            | Target | Actual             |
|---------|--------|-------------------|--------|-------------------|--------|--------------------|
| 2 wAFB  | 3      | 3.4 ( $\pm 0.6$ ) | 6      | 6.2 ( $\pm 1.4$ ) | 9      | 9.4 ( $\pm 0.9$ )  |
| 6 wAFB  | 3      | 4.1 ( $\pm 0.5$ ) | 6      | 7.4 ( $\pm 0.4$ ) | 9      | 10.3 ( $\pm 0.7$ ) |
| 10 wAFB | 3      | 3.2 ( $\pm 0.3$ ) | 6      | 6.3 ( $\pm 0.2$ ) | 9      | 9.6 ( $\pm 0.3$ )  |
| 14 wAFB | 3      | 3.8 ( $\pm 0.2$ ) | 6      | 6.6 ( $\pm 0.2$ ) | 9      | 9.2 ( $\pm 0.8$ )  |
